# Supplementary material
Source: publisher site journal article supplement (https://www.dovepress.com/article/428783)
Supplement: Supplementary file 1 [file get_supplementary_file.php]

## Supplementary File

**Supplementary Table 1 The recruiting criteria for patients in this study.**

| Recruiting criteria    | Content                                                                                                                                                                                                                                                                                                                                                                                                                                                                                                                                          |
|------------------------|--------------------------------------------------------------------------------------------------------------------------------------------------------------------------------------------------------------------------------------------------------------------------------------------------------------------------------------------------------------------------------------------------------------------------------------------------------------------------------------------------------------------------------------------------|
| The inclusion criteria | 1) diagnosis of CNG according to Chinese Consensus on Chronic Gastritis, 2) aged between 35 and 70 years, 3) voluntary provision of written informed consent.                                                                                                                                                                                                                                                                                                                                                                                    |
| The exclusion criteria | 1) Patients with gastric related surgery, 2) Patients with atrophic changes, intestinal metaplasia or suspected malignant changes in the gastric mucosa, 3) Comorbidities of other system diseases in heart, liver, lung, kidney or blood system, 4) Female patients is going to having a baby, pregnant or lactating, 5) Having life-threatening illness such as tumor and so on, 6) Patients received other kinds of medicine in the last 2 weeks before recruitment, 7) Judged as inappropriate to be enrolled in the trial by investigators. |
| The rejection criteria | 1) Misdiagnosis, 2) Patients who do not follow the drug dosage taking, 3) Patients who cannot complete the follow-up.                                                                                                                                                                                                                                                                                                                                                                                                                            |

**Supplementary Table 2 The parameters for chromatography for evodiamine, rutaecarpine, limonin, 6-gingerol, and ginsenoside Rb1**

| Time (min) | A (C <sub>2</sub> H <sub>3</sub> N) | B (0.01% H <sub>3</sub> PO <sub>4</sub> ) |
|------------|-------------------------------------|-------------------------------------------|
| 0          | 10                                  | 90                                        |
| 10         | 15                                  | 85                                        |
| 40         | 30                                  | 70                                        |
| 51         | 90                                  | 10                                        |
| 60         | 90                                  | 10                                        |
| 61         | 10                                  | 90                                        |
| 75         | 10                                  | 90                                        |

Note: Chromatographic column: Welch Ultimate AQ-C18 (4.6×250 mm, 5 μm), detection wavelength: 203 nm; flow rate: 1 ml/min, column temperature: 30 °C; injection volume: 10 μl.

**Supplementary Table 3 The parameters for chromatography for dehydroevodiamine.**

| Time (min) | A (C <sub>2</sub> H <sub>3</sub> N) | B (0.01% H <sub>3</sub> PO <sub>4</sub> ) |
|------------|-------------------------------------|-------------------------------------------|
| 0          | 10                                  | 90                                        |
| 10         | 15                                  | 85                                        |
| 40         | 30                                  | 70                                        |

Note: Chromatographic column: Welch Ultimate AQ-C18 (4.6×250 mm, 5 μm), detection wavelength: 203 nm; flow rate: 1 ml/min, column temperature: 30 °C; injection volume: 10 μl.

**Supplementary Table 4 Score of endoscopy evaluation**

| <b>Item</b> | <b>Grade</b>                                                           | <b>Score</b> |
|-------------|------------------------------------------------------------------------|--------------|
| Red plaques | No red plaques in gastric mucosa                                       | 0            |
|             | Red plaques with sporadic or interrupted linear type in gastric mucosa | 1            |
|             | Intensive plaques or linear series type in gastric mucosa              | 2            |
|             | Red plaques with extensive and obvious fusion type in gastric mucosa   | 3            |
| Erosion     | No ruptured erosion                                                    | 0            |
|             | Sporadic erosion in gastric mucosa                                     | 1            |
|             | Local, multiple erosion in gastric mucosa and no more than five area   | 2            |
|             | Extensive, multiple erosion in gastric mucosa and more than five area  | 3            |
| Hemorrhage  | No flattened hemorrhagic spots or plaques in gastric mucosa            | 0            |
|             | Local hemorrhagic spots or plaques in gastric mucosa                   | 1            |
|             | Multiple sites of hemorrhagic spots or plaques in gastric mucosa       | 2            |
|             | Widespread hemorrhagic spots or plaques in gastric mucosa              | 3            |
| Bile reflux | No bile flow back into stomach                                         | 0            |
|             | Mild yellow bile flow back into stomach or yellowish mucinous lake     | 1            |
|             | Middle yellow bile flow back into stomach                              | 2            |
|             | Massive yellow bile flow back into stomach                             | 3            |

Notes: This table referred the standard in Chinese Consensus on Chronic Gastritis and the literature of 'XX Zhang, WW Chen, B She, et al. The efficacy and safety of Jian-Wei-Qu-Tong Pills for the treatment of chronic non-atrophic gastritis (spleen and stomach qi deficiency with damp-heat stasis syndrome): study protocol for a phase II, randomized controlled trial. Trial. 2014, 15: 272'.

**Supplementary Table 5 Grade of histopathological changes**

| <b>Item</b>                 | <b>Grade</b>                                                                                                                          | <b>Score</b> |
|-----------------------------|---------------------------------------------------------------------------------------------------------------------------------------|--------------|
| Chronic inflammation        | Normal mononuclear cells in gastric mucosa                                                                                            | 0            |
|                             | No more than 1/3 of chronic inflammatory cells localized in the mucosa                                                                | 1            |
|                             | More than 1/3 but no more than 2/3 of chronic inflammatory cells localized in the mucosa                                              | 2            |
|                             | Dense accumulation of chronic inflammatory cells in the whole mucosa                                                                  | 3            |
| Active chronic inflammation | Normal neutrophils in mucosal layer                                                                                                   | 0            |
|                             | No more than 1/3 of neutrophils in lamina propria of the mucosa                                                                       | 1            |
|                             | More than 1/3 but no more than 2/3 of neutrophils in the mucosal layer and in superficial, pit as well as glandular epithelial cells. | 2            |
|                             | Dense infiltration of neutrophils, abscess with moderate activity.                                                                    | 3            |

Notes: This table referred the standard in Chinese Consensus on Chronic Gastritis and the literature of 'XX Zhang, WW Chen, B She, et al. The efficacy and safety of Jian-Wei-Qu-Tong Pills for the treatment of chronic non-atrophic gastritis (spleen and stomach qi deficiency with damp-heat stasis syndrome): study protocol for a phase II, randomized controlled trial. Trial. 2014, 15: 272'.

**Supplementary Table 6 The stabilization and control for representative compounds in**

**WZYD**

| Compounds         | Content in sample(mg) | Content (mg/g) |
|-------------------|-----------------------|----------------|
| Ginsenoside Rb1   | 0.7178                | 0.6766         |
| Dehydroevodiamine | 0.6773                | 0.6384         |
| Limonin           | 2.8144                | 2.6529         |
| 6-Gingerol        | 0.1634                | 0.1540         |
| Evodiamine        | 3.9623                | 3.7348         |
| Rutaecarpine      | 0.8555                | 0.8064         |

**Supplementary Table 7 Core metabolites identified as the biomarkers for the difference between WZYD B and WZYD A. (WZYD B, patients before WZYD treatment; WZYD A, patients after WZYD treatment; HP, healthy people)**

| <b>Fomula</b> | <b>Compounds</b>                         | <b>Class I</b>                      | <b>Class II</b>                     | <b>Regulation</b> |
|---------------|------------------------------------------|-------------------------------------|-------------------------------------|-------------------|
| C22H32O3      | 16-HDoHE                                 | FA                                  | Oxidized lipids                     | up                |
| C10H14N5O7P   | 3'-Adenylic acid                         | Nucleotide And Its metabolites      | Nucleotide And Its metabolites      | down              |
| C8H8O4        | 3-Hydroxy-4-methoxybenzoic acid          | Benzene and substituted derivatives | Benzene and substituted derivatives | up                |
| C11H9NO4      | 8-Methoxyalkynurate                      | Organic acid And Its derivatives    | Organic acid And Its derivatives    | down              |
| C32H58N2O7S   | Chaps                                    | Bile acids                          | Bile acids                          | up                |
| C5H11O8P      | D-Arabinose 5-phosphate                  | Carbohydrates and Its metabolites   | Phosphate sugars                    | up                |
| C5H6N2O4      | L-Dihydroorotic Acid                     | Organic acid And Its derivatives    | Organic acid And Its derivatives    | down              |
| C9H19NO4      | Pantothenol                              | CoEnzyme and vitamins               | CoEnzyme and vitamins               | up                |
| C5H4N2O2      | Pyrimidine-4-carboxylic acid sodium salt | Heterocyclic compounds              | Heterocyclic compounds              | up                |
| C33H42N4O6    | Urobilin                                 | Tryptamines,Cholines,Pigments       | Pigments                            | up                |

**Supplementary Table 8 Differential metabolites among HP, WZYD B and WZYD A. (WZYD B, patients before WZYD treatment; WZYD A, patients after WZYD treatment; HP, healthy people)**

| Formula  | Compounds                            | Class I                          | Class II                         | HP/WZYD B | HP/WZYD A | WZYD B/WZYD A |
|----------|--------------------------------------|----------------------------------|----------------------------------|-----------|-----------|---------------|
| C10H16O4 | (+)-Camphoric acid                   | Organic acid And Its derivatives | Organic acid And Its derivatives | up        | up        | FALSE         |
| C6H11NO2 | (+/-)-High-Proline                   | Amino acid and Its metabolites   | Amino acid derivatives           | down      | FALSE     | FALSE         |
| C18H35NO | (E,Z)-2-Amino-3,14-octadecadien-1-ol | Alcohol and amines               | Alcohols                         | FALSE     | down      | FALSE         |
| C14H28O3 | (R)-3-Hydroxymyristic acid           | Organic acid And Its derivatives | Organic acid And Its derivatives | down      | down      | FALSE         |
| C9H10O3  | (S)-2-Hydroxy-3-phenylpropanoic acid | Organic acid And Its derivatives | Organic acid And Its derivatives | down      | down      | FALSE         |
| C6H12O3  | (S)-Leucic acid                      | Organic acid And Its derivatives | Organic acid And Its derivatives | down      | down      | FALSE         |
| C20H30O3 | (±)12-HEPE                           | FA                               | Oxidized lipids                  | down      | down      | FALSE         |
| C20H32O3 | (±)12-HETE                           | FA                               | Oxidized lipids                  | down      | down      | FALSE         |
| C20H30O3 | (±)15-HEPE                           | FA                               | Oxidized lipids                  | down      | down      | FALSE         |
| C20H32O3 | (±)15-HETE                           | FA                               | Oxidized lipids                  | down      | down      | FALSE         |
| C20H30O3 | (±)18-HEPE                           | FA                               | Oxidized lipids                  | down      | down      | FALSE         |
| C5H9NO2  | 1-Aminocyclobutanecarboxylic acid    | Amino acid and Its metabolites   | Amino acid derivatives           | down      | down      | FALSE         |
| C11H8O3  | 1-Hydroxy-2-Naphthoate               | Organic acid And Its derivatives | Organic acid And Its derivatives | down      | down      | FALSE         |
| C11H15N5 | 1-Methyladenosine                    | Nucleotide And Its               | Nucleotide And Its               | up        | up        | FALSE         |



|          |                                  |                         |                         |      |       |       |
|----------|----------------------------------|-------------------------|-------------------------|------|-------|-------|
| O4       |                                  | metabolites             | metabolites             |      |       |       |
|          |                                  | Benzene and substituted | Benzene and substituted |      |       |       |
| C14H18O9 | 1-O-vanillyl- $\beta$ -D-glucose | derivatives             | derivatives             | up   | up    | FALSE |
| C18H36O3 | 10-Hydroxystearic Acid           | FA                      | Oxidized lipids         | down | down  | FALSE |
| C20H32O3 | 11,12-EET                        | FA                      | Oxidized lipids         | down | down  | FALSE |
| C22H32O3 | 11-HDoHE                         | FA                      | Oxidized lipids         | down | down  | FALSE |
| C18H34O4 | 12,13-DiHOME                     | FA                      | Oxidized lipids         | down | FALSE | FALSE |
| C18H32O3 | 12,13-EpOME                      | FA                      | Oxidized lipids         | down | down  | FALSE |
| C12H24O3 | 12-Hydroxydodecanoic acid        | FA                      | FFA                     | up   | up    | FALSE |
| C18H36O3 | 12-Hydroxyoctadecanoic acid      | FA                      | FFA                     | down | down  | FALSE |
| C22H32O3 | 14(S)-HDHA                       | FA                      | Oxidized lipids         | down | down  | FALSE |
| C20H28O3 | 15-deoxy- $\delta$ -12,14-PGJ2   | FA                      | Oxidized lipids         | up   | up    | FALSE |
| C22H29Cl |                                  | Hormones and hormone    | Hormones and hormone    |      |       |       |
| O6       | 15S-Cloprostenol                 | related compounds       | related compounds       | up   | up    | FALSE |
| C22H32O3 | 16-HDoHE                         | FA                      | Oxidized lipids         | down | FALSE | up    |
| C10H12N4 |                                  | Nucleotide And Its      | Nucleotide And Its      |      |       |       |
| O4       | 2'-Deoxyinosine                  | metabolites             | metabolites             | up   | up    | FALSE |
| C11H15N5 |                                  | Nucleotide And Its      | Nucleotide And Its      |      |       |       |
| O4       | 2'-O-methyladenosine             | metabolites             | metabolites             | down | down  | FALSE |
|          |                                  | Organic acid And Its    | Organic acid And Its    |      |       |       |
| C7H14O2  | 2,2-Dimethylpentanoic acid       | derivatives             | derivatives             | down | down  | FALSE |
|          | 2,6,6-Trimethyl-2-cyclohexene-1, |                         |                         |      |       |       |
| C9H12O2  | 4-dione                          | Aldehyde,Ketones,Esters | Ketones                 | up   | up    | FALSE |
|          |                                  | Benzene and substituted |                         |      |       |       |
| C9H10O3  | 2-(4-hydroxyphenyl) propionate   | derivatives             | Phenolic acids          | down | down  | FALSE |
| C8H7NO3  | 2-(Formylamino)Benzoic Acid      | Benzene and substituted | Phenolic acids          | up   | FALSE | FALSE |

|               |                                               |                                        |                                        |       |      |       |
|---------------|-----------------------------------------------|----------------------------------------|----------------------------------------|-------|------|-------|
| C7H8O2        | 2-Acetyl-5-methylfuran                        | derivatives<br>Heterocyclic compounds  | Heterocyclic compounds                 | up    | up   | FALSE |
| C8H6O3        | 2-Carboxybenzaldehyde                         | Benzene and substituted<br>derivatives | Benzene and substituted<br>derivatives | up    | up   | FALSE |
| C5H10O3       | 2-Hydroxy-2-Methyl Butyric acid               | Organic acid And Its<br>derivatives    | Organic acid And Its<br>derivatives    | down  | down | FALSE |
| C5H10O3       | 2-Hydroxy-3-Methyl Butanoic<br>Acid           | Organic acid And Its<br>derivatives    | Organic acid And Its<br>derivatives    | down  | down | FALSE |
| C5H10O3S      | 2-Hydroxy-4-(methylthio)butyric<br>acid       | Organic acid And Its<br>derivatives    | Organic acid And Its<br>derivatives    | up    | up   | FALSE |
| C8H16O3       | 2-Hydroxycaprylic acid                        | Organic acid And Its<br>derivatives    | Organic acid And Its<br>derivatives    | down  | down | FALSE |
| C6H12O3       | 2-Hydroxyhexanoic acid                        | Organic acid And Its<br>derivatives    | Organic acid And Its<br>derivatives    | down  | down | FALSE |
| C6H12O3       | 2-Hydroxyisocaproic Acid                      | Organic acid And Its<br>derivatives    | Organic acid And Its<br>derivatives    | down  | down | FALSE |
| C5H12O9P<br>2 | 2-Methyl-d-erythritol<br>2,4-cyclodiphosphate | Carbohydrates and Its<br>metabolites   | Phosphate sugars                       | down  | down | FALSE |
| C6H10O4       | 2-Methylglutaric Acid                         | Organic acid And Its<br>derivatives    | Organic acid And Its<br>derivatives    | down  | down | FALSE |
| C7H14O2       | 2-Methylhexanoic acid                         | Organic acid And Its<br>derivatives    | Organic acid And Its<br>derivatives    | down  | down | FALSE |
| C4H7NO        | 2-Pyrrolidinone                               | Heterocyclic compounds                 | Heterocyclic compounds                 | up    | up   | FALSE |
| C6H10O7       | 2-keto-D-gluconic acid                        | Carbohydrates and Its<br>metabolites   | Sugar acids                            | down  | down | FALSE |
| C10H14N5      | 3'-Adenylic acid                              | Nucleotide And Its                     | Nucleotide And Its                     | FALSE | down | down  |

|            |                                          |                                     |                                     |       |       |       |
|------------|------------------------------------------|-------------------------------------|-------------------------------------|-------|-------|-------|
| O7P        |                                          | metabolites                         | metabolites                         |       |       |       |
| C12H16O5   | 3-(3,4,5-trimethoxyphenyl)propionic acid | Organic acid And Its derivatives    | Organic acid And Its derivatives    | up    | up    | FALSE |
| C9H10O3    | 3-(3-Hydroxyphenyl)Propionate Acid       | Organic acid And Its derivatives    | Organic acid And Its derivatives    | up    | up    | FALSE |
| C4H10OS    | 3-(Methylthio)-1-propanol                | Alcohol and amines                  | Alcohols                            | up    | up    | FALSE |
| C11H9NO2   | 3-Amino-2-menacarboxylic acid            | Benzene and substituted derivatives | Phenolic acids                      | FALSE | down  | FALSE |
| C7H7NO3    | 3-Amino-4-Hydroxybenzoic Acid            | Benzene and substituted derivatives | Phenolic acids                      | up    | up    | FALSE |
| C7H7NO3    | 3-Amino-5-hydroxybenzoic acid            | Organic acid And Its derivatives    | Organic acid And Its derivatives    | up    | up    | FALSE |
| C8H8O4     | 3-Hydroxy-4-methoxybenzoic acid          | Benzene and substituted derivatives | Benzene and substituted derivatives | down  | FALSE | up    |
| C9H11NO3   | 3-Hydroxy-L-phenylalanine                | Amino acid and Its metabolites      | Amino acid derivatives              | up    | up    | FALSE |
| C14H28O3   | 3-Hydroxy-tetradecanoic acid             | Organic acid And Its derivatives    | Organic acid And Its derivatives    | down  | down  | FALSE |
| C7H7NO3    | 3-Hydroxyanthranilic Acid                | Benzene and substituted derivatives | Phenolic acids                      | up    | up    | FALSE |
| C12H16N2O4 | 3-Hydroxycaprolactone                    | Aldehyde,Ketones,Esters             | Esters                              | up    | up    | FALSE |
| C9H8O3     | 3-Hydroxycinnamic acid                   | Organic acid And Its derivatives    | Organic acid And Its derivatives    | down  | down  | FALSE |
| C5H8O5     | 3-Hydroxyglutaric acid                   | Organic acid And Its derivatives    | Organic acid And Its derivatives    | down  | down  | FALSE |

|          |                                            |                                     |                                     |       |       |       |
|----------|--------------------------------------------|-------------------------------------|-------------------------------------|-------|-------|-------|
| C9H9NO4  | 3-Hydroxyhippuric Acid                     | Amino acid and Its metabolites      | Amino acid derivatives              | up    | FALSE | FALSE |
| C8H8O3   | 3-Hydroxyphenylacetic acid                 | Organic acid And Its derivatives    | Organic acid And Its derivatives    | down  | down  | FALSE |
| C6H10O2  | 3-methyl-4-pentenoic acid                  | Organic acid And Its derivatives    | Organic acid And Its derivatives    | up    | up    | FALSE |
| C6H9N3O  | 4-Amino-5-hydroxymethyl-2-methylpyrimidine | Heterocyclic compounds              | Heterocyclic compounds              | up    | up    | FALSE |
| C10H20O2 | 4-Ethyl octanoic acid                      | Organic acid And Its derivatives    | Organic acid And Its derivatives    | down  | down  | FALSE |
| C5H6O6   | 4-Hydroxy-2-Oxoglutaric Acid               | Organic acid And Its derivatives    | Organic acid And Its derivatives    | up    | up    | FALSE |
| C9H10O4  | 4-Hydroxy-3-methoxyphenylacetic acid       | Organic acid And Its derivatives    | Organic acid And Its derivatives    | up    | up    | FALSE |
| C7H8O2   | 4-Hydroxybenzyl alcohol                    | Benzene and substituted derivatives | Benzene and substituted derivatives | up    | up    | FALSE |
| C9H9NO4  | 4-Hydroxyhippurate                         | Amino acid and Its metabolites      | Amino acid derivatives              | up    | FALSE | FALSE |
| C20H28O3 | 4-Hydroxyretinoic Acid                     | CoEnzyme and vitamins               | CoEnzyme and vitamins               | up    | up    | FALSE |
| C7H14O2  | 4-Methylhexanoic acid                      | Organic acid And Its derivatives    | Organic acid And Its derivatives    | down  | down  | FALSE |
| C9H18O2  | 4-Methyloctanoic acid                      | Organic acid And Its derivatives    | Organic acid And Its derivatives    | down  | down  | FALSE |
| C20H26O3 | 4-Oxoretinoic acid                         | Benzene and substituted derivatives | Benzene and substituted derivatives | FALSE | down  | FALSE |
| C8H8O3   | 4-acetoxyphenol                            | Benzene and substituted             | Phenolics                           | up    | up    | FALSE |

|                 |                                                  |                                                  |                                     |       |       |       |
|-----------------|--------------------------------------------------|--------------------------------------------------|-------------------------------------|-------|-------|-------|
| C11H15N5<br>O3S | 5'-Deoxy-5'-(Methylthio)<br>Adenosine            | derivatives<br>Nucleotide And Its<br>metabolites | Nucleotide And Its<br>metabolites   | up    | up    | FALSE |
| C8H14N3O<br>7P  | 5-Aminoimidazole ribonucleotide                  | Nucleotide And Its<br>metabolites                | Nucleotide And Its<br>metabolites   | down  | down  | FALSE |
| C9H12N2O<br>6   | 5-Hydroxy-2'-deoxyuridine                        | Nucleotide And Its<br>metabolites                | Nucleotide And Its<br>metabolites   | up    | up    | FALSE |
| C6H12O3         | 5-Hydroxyhexanoic Acid                           | Organic acid And Its<br>derivatives              | Organic acid And Its<br>derivatives | down  | down  | FALSE |
| C8H7NO          | 5-Hydroxyindole                                  | Heterocyclic compounds                           | Indole and Its derivatives          | down  | down  | FALSE |
| C5H7N3O         | 5-Methylcytosine                                 | Nucleotide And Its<br>metabolites                | Nucleotide And Its<br>metabolites   | up    | up    | FALSE |
| C10H14N2<br>O6  | 5-Methyluridine                                  | Nucleotide And Its<br>metabolites                | Nucleotide And Its<br>metabolites   | up    | up    | FALSE |
| C6H7N3O         | 6-aminonicotinamide                              | Nucleotide And Its<br>metabolites                | Nucleotide And Its<br>metabolites   | down  | FALSE | FALSE |
| C16H23N5<br>O5  | 7-(alpha-D-glucosyl)-N(6)-isopen<br>tenyladenine | Nucleotide And Its<br>metabolites                | Nucleotide And Its<br>metabolites   | down  | FALSE | FALSE |
| C6H7N5O         | 7-Methylguanine                                  | Nucleotide And Its<br>metabolites                | Nucleotide And Its<br>metabolites   | up    | up    | FALSE |
| C11H9NO4        | 8-Methoxyalkynurate                              | Organic acid And Its<br>derivatives              | Organic acid And Its<br>derivatives | FALSE | down  | down  |
| C20H36O5        | 8-isoprostaglandin F1 $\alpha$                   | FA                                               | Oxidized lipids                     | up    | up    | FALSE |
| C18H34O5        | 9(S),12(S),13(S)-TriHOME                         | FA                                               | Oxidized lipids                     | down  | down  | FALSE |
| C18H34O4        | 9,10-DiHOME                                      | FA                                               | Oxidized lipids                     | down  | down  | FALSE |
| C18H32O3        | 9,10-EpOME                                       | FA                                               | Oxidized lipids                     | down  | down  | FALSE |

|            |                            |                                        |                                        |       |       |       |
|------------|----------------------------|----------------------------------------|----------------------------------------|-------|-------|-------|
| C18H36O4   | 9,10-dihydroxystearic acid | FA                                     | FFA                                    | down  | down  | FALSE |
| C20H32O2   | AA                         | FA                                     | Oxidized lipids                        | down  | down  | FALSE |
| C20H30O2   | Abietic acid               | Others                                 | Others                                 | down  | down  | FALSE |
| C7H13NO3   | Acetylvaline               | Amino acid and Its metabolites         | Amino acid derivatives                 | up    | up    | FALSE |
| C6H10O4    | Adipic Acid                | Organic acid And Its derivatives       | Organic acid And Its derivatives       | down  | down  | FALSE |
| C5H14N4    | Agmatine                   | Alcohol and amines                     | Polyamines                             | up    | up    | FALSE |
| C8H14N2O   | Ala-Glu                    | Amino acid and Its metabolites         | Small Peptide                          | up    | up    | FALSE |
| C9H19N3O   | Ala-Lys                    | Amino acid and Its metabolites         | Amino acid derivatives                 | down  | down  | FALSE |
| C8H14N2O   | Ala-Pro                    | Amino acid and Its metabolites         | Small Peptide                          | up    | up    | FALSE |
| C6H12N2O   | Ala-Ser                    | Amino acid and Its metabolites         | Small Peptide                          | up    | up    | FALSE |
| C19H26O2   | Androstenedione            | Hormones and hormone related compounds | Hormones and hormone related compounds | up    | up    | FALSE |
| C9H17N3O   | Asn-Met                    | Amino acid and Its metabolites         | Small Peptide                          | FALSE | up    | FALSE |
| C13H16N2O5 | Asp-Phe                    | Amino acid and Its metabolites         | Small Peptide                          | up    | up    | FALSE |
| C9H16O4    | Azelaic Acid               | Organic acid And Its derivatives       | Organic acid And Its derivatives       | up    | up    | FALSE |
| C6H13NO4   | Bicine                     | Organic acid And Its derivatives       | Organic acid And Its derivatives       | down  | FALSE | FALSE |

|          |                    |                             |          |       |       |       |
|----------|--------------------|-----------------------------|----------|-------|-------|-------|
| C33H34N4 |                    | Tryptamines,Cholines,Pigmen |          |       |       |       |
| O6       | Biliverdin         | ts                          | Pigments | down  | down  | FALSE |
| C6H17N3  | Caldine            | Alcohol and amines          | Amines   | down  | down  | FALSE |
| C21H41NO |                    |                             |          |       |       |       |
| 5        | Carnitine C14-OH   | FA                          | CAR      | down  | down  | FALSE |
| C21H41NO |                    |                             |          |       |       |       |
| 4        | Carnitine C14:0    | FA                          | CAR      | down  | down  | FALSE |
| C21H37NO |                    |                             |          |       |       |       |
| 5        | Carnitine C14:2-OH | FA                          | CAR      | FALSE | down  | FALSE |
| C21H35NO |                    |                             |          |       |       |       |
| 6        | Carnitine C14:2:DC | FA                          | CAR      | down  | down  | FALSE |
| C22H41NO |                    |                             |          |       |       |       |
| 6        | Carnitine C15:DC   | FA                          | CAR      | down  | down  | FALSE |
| C23H45NO |                    |                             |          |       |       |       |
| 5        | Carnitine C16-OH   | FA                          | CAR      | down  | down  | FALSE |
| C23H45NO |                    |                             |          |       |       |       |
| 4        | Carnitine C16:0    | FA                          | CAR      | down  | down  | FALSE |
| C23H43NO |                    |                             |          |       |       |       |
| 4        | Carnitine C16:1    | FA                          | CAR      | down  | down  | FALSE |
| C23H41NO |                    |                             |          |       |       |       |
| 4        | Carnitine C16:2    | FA                          | CAR      | down  | FALSE | FALSE |
| C25H49NO |                    |                             |          |       |       |       |
| 5        | Carnitine C18-OH   | FA                          | CAR      | FALSE | down  | FALSE |
| C25H47NO |                    |                             |          |       |       |       |
| 5        | Carnitine C18:1-OH | FA                          | CAR      | down  | down  | FALSE |
| C25H45NO | Carnitine C18:2    | FA                          | CAR      | down  | down  | FALSE |

|          |                         |                                  |                                  |      |       |       |
|----------|-------------------------|----------------------------------|----------------------------------|------|-------|-------|
| 4        |                         |                                  |                                  |      |       |       |
| C25H45NO |                         |                                  |                                  |      |       |       |
| 5        | Carnitine C18:2-OH      | FA                               | CAR                              | down | down  | FALSE |
| C25H43NO |                         |                                  |                                  |      |       |       |
| 4        | Carnitine C18:3         | FA                               | CAR                              | down | down  | FALSE |
| C27H49NO |                         |                                  |                                  |      |       |       |
| 4        | Carnitine C20:2         | FA                               | CAR                              | down | down  | FALSE |
| C9H17NO4 | Carnitine C2:0          | FA                               | CAR                              | down | down  | FALSE |
| C13H23NO |                         |                                  |                                  |      |       |       |
| 6        | Carnitine C6:DC         | FA                               | CAR                              | up   | up    | FALSE |
| C32H58N2 |                         |                                  |                                  |      |       |       |
| O7S      | Chaps                   | Bile acids                       | Bile acids                       | down | down  | up    |
|          |                         | Organic acid And Its derivatives | Organic acid And Its derivatives |      |       |       |
| C6H8O7   | Citric Acid             |                                  |                                  | down | down  | FALSE |
| C8H16N2O |                         | Organic acid And Its derivatives | Organic acid And Its derivatives |      |       |       |
| 4        | Cork-oximate            |                                  |                                  | up   | up    | FALSE |
| C4H10N3O |                         | Nucleotide And Its metabolites   | Nucleotide And Its metabolites   |      |       |       |
| 5P       | Creatine phosphate      |                                  |                                  | down | down  | FALSE |
| C14H16N2 |                         | Amino acid and Its metabolites   |                                  |      |       |       |
| O4       | Cyclo(Phe-Glu)          |                                  | Small Peptide                    | down | FALSE | FALSE |
|          |                         | Nucleotide And Its metabolites   | Nucleotide And Its metabolites   |      |       |       |
| C5H9N3O2 | Cyclocreatine           |                                  |                                  | up   | up    | FALSE |
| C8H14N2O |                         | Amino acid and Its metabolites   |                                  |      |       |       |
| 3S       | Cys-Pro                 |                                  | Small Peptide                    | down | down  | FALSE |
| C9H15N3O |                         | Nucleotide And Its metabolites   | Nucleotide And Its metabolites   |      |       |       |
| 11P2     | Cytidine 5'-diphosphate |                                  |                                  | down | down  | FALSE |



|             |                                        |                                     |                                     |       |       |       |
|-------------|----------------------------------------|-------------------------------------|-------------------------------------|-------|-------|-------|
| C12H22O11   | D-(+)-sucrose                          | Carbohydrates and Its metabolites   | Sugars                              | down  | down  | FALSE |
| C5H11O8P    | D-Arabinose 5-phosphate                | Carbohydrates and Its metabolites   | Phosphate sugars                    | down  | FALSE | up    |
| C6H11Na2O9P | D-Fructose 6-Phosphate-Disodium Salt   | Carbohydrates and Its metabolites   | Phosphate sugars                    | down  | down  | FALSE |
| C6H10O7     | D-Galacturonic Acid                    | Carbohydrates and Its metabolites   | Sugar acids                         | down  | down  | FALSE |
| C6H12O7     | D-Gluconic Acid                        | Carbohydrates and Its metabolites   | Sugar acids                         | down  | down  | FALSE |
| C6H13NO6    | D-Glucosaminic acid                    | Carbohydrates and Its metabolites   | Sugar acids                         | FALSE | up    | FALSE |
| C6H13O9P    | D-Glucose 6-Phosphate                  | Carbohydrates and Its metabolites   | Phosphate sugars                    | down  | down  | FALSE |
| C4H6O5      | D-Malic acid                           | Organic acid And Its derivatives    | Organic acid And Its derivatives    | down  | down  | FALSE |
| C6H13O9P    | D-Mannose 6-phosphate                  | Carbohydrates and Its metabolites   | Phosphate sugars                    | down  | down  | FALSE |
| C6H8O7      | D-Saccharic Acid 1,4-lactone (hydrate) | Carbohydrates and Its metabolites   | Sugars                              | down  | down  | FALSE |
| C12H22O11   | D-cellobiose                           | Carbohydrates and Its metabolites   | Sugars                              | up    | up    | FALSE |
| C22H32O2    | DHA                                    | FA                                  | Oxidized lipids                     | down  | FALSE | FALSE |
| C8H10O4     | DL-3,4-Dihydroxyphenyl glycol          | Benzene and substituted derivatives | Benzene and substituted derivatives | up    | up    | FALSE |
| C10H18N2    | Dethiobiotin                           | CoEnzyme and vitamins               | CoEnzyme and vitamins               | up    | up    | FALSE |

O3

|                 |                   | Benzene and substituted derivatives | Benzene and substituted derivatives |       |       |       |
|-----------------|-------------------|-------------------------------------|-------------------------------------|-------|-------|-------|
| C9H9NO4         | Dopaquinone       |                                     |                                     | up    | up    | FALSE |
| C20H30O2        | EPA               | FA                                  | Oxidized lipids                     | down  | down  | FALSE |
| C10H20O2        | FFA(10:0)         | FA                                  | FFA                                 | down  | down  | FALSE |
| C12H24O2        | FFA(12:0)         | FA                                  | FFA                                 | down  | down  | FALSE |
| C14H28O2        | FFA(14:0)         | FA                                  | FFA                                 | down  | down  | FALSE |
| C18H28O2        | FFA(18:4)         | FA                                  | FFA                                 | FALSE | down  | FALSE |
| C20H32O2        | FFA(20:4)         | FA                                  | FFA                                 | down  | down  | FALSE |
| C22H36O2        | FFA(22:4)         | FA                                  | FFA                                 | down  | down  | FALSE |
| C22H32O2        | FFA(22:6)         | FA                                  | FFA                                 | down  | FALSE | FALSE |
| C22H30O2        | FFA(22:7)         | FA                                  | FFA                                 | down  | down  | FALSE |
| C9H18O2         | FFA(9:0)          | FA                                  | FFA                                 | down  | down  | FALSE |
| C9H14O3         | Furfural diacetal | Others                              | Others                              | up    | up    | FALSE |
| C7H13N3O<br>4   | Gln-Gly           | Amino acid and Its metabolites      | Small Peptide                       | down  | down  | FALSE |
| C11H20N2<br>O5  | Glu-Ile           | Amino acid and Its metabolites      | Small Peptide                       | FALSE | up    | FALSE |
| C10H18N2<br>O5S | Glu-Met           | Amino acid and Its metabolites      | Small Peptide                       | up    | up    | FALSE |
| C10H18N2<br>O5  | Glu-Val           | Amino acid and Its metabolites      | Small Peptide                       | up    | up    | FALSE |
| C7H13N3O<br>4   | Gly-Gln           | Amino acid and Its metabolites      | Small Peptide                       | down  | down  | FALSE |
| C8H17N3O<br>3   | Gly-Lys           | Amino acid and Its metabolites      | Small Peptide                       | FALSE | down  | FALSE |

|                |                                               |                                     |                                     |       |      |       |
|----------------|-----------------------------------------------|-------------------------------------|-------------------------------------|-------|------|-------|
| C11H14N2<br>O3 | Gly-Phe                                       | Amino acid and Its<br>metabolites   | Amino acid derivatives              | up    | up   | FALSE |
| C20H23N3<br>O4 | Gly-Phe-Phe                                   | Amino acid and Its<br>metabolites   | Small Peptide                       | up    | up   | FALSE |
| C25H44NO<br>7P | Glycerophospho-N-Arachidonoyl<br>Ethanolamine | GP                                  | LPE                                 | up    | up   | FALSE |
| C10H13N5<br>O5 | Guanosine                                     | Nucleotide And Its<br>metabolites   | Nucleotide And Its<br>metabolites   | up    | up   | FALSE |
| C9H10O4        | Hydroxyphenyllactic acid                      | Organic acid And Its<br>derivatives | Organic acid And Its<br>derivatives | down  | down | FALSE |
| C5H10N2O<br>3  | Hydroxypiperazic acid                         | Heterocyclic compounds              | Heterocyclic compounds              | up    | up   | FALSE |
| CH4N2O2        | Hydroxyurea                                   | Others                              | Others                              | down  | down | FALSE |
| C8H14N2O<br>5  | Hyp-Ser                                       | Amino acid and Its<br>metabolites   | Small Peptide                       | up    | up   | FALSE |
| C9H16N2O<br>5  | Hyp-Thr                                       | Amino acid and Its<br>metabolites   | Small Peptide                       | down  | down | FALSE |
| C3H9N3O2<br>S  | Hypotaurocyamine                              | Alcohol and amines                  | Polyamines                          | up    | up   | FALSE |
| C9H18N2O<br>3  | Ile-Ala                                       | Amino acid and Its<br>metabolites   | Small Peptide                       | up    | up   | FALSE |
| C11H20N2<br>O5 | Ile-Glu                                       | Amino acid and Its<br>metabolites   | Small Peptide                       | FALSE | up   | FALSE |
| C12H20N4<br>O3 | Ile-His                                       | Amino acid and Its<br>metabolites   | Small Peptide                       | down  | down | FALSE |
| C12H24N2       | Ile-Ile                                       | Amino acid and Its                  | Small Peptide                       | up    | up   | FALSE |

|          |                         |                        |                            |       |      |       |
|----------|-------------------------|------------------------|----------------------------|-------|------|-------|
| O3       |                         | metabolites            |                            |       |      |       |
| C12H24N2 |                         | Amino acid and Its     |                            |       |      |       |
| O3       | Ile-Leu                 | metabolites            | Small Peptide              | up    | up   | FALSE |
| C12H25N3 |                         | Amino acid and Its     |                            |       |      |       |
| O3       | Ile-Lys                 | metabolites            | Small Peptide              | down  | down | FALSE |
| C9H7NO   | Indole-3-Carboxaldehyde | Heterocyclic compounds | Indole and Its derivatives | FALSE | up   | FALSE |
| C11H11NO |                         |                        |                            |       |      |       |
| 3        | Indole-3-lactic acid    | Heterocyclic compounds | Indole and Its derivatives | FALSE | down | FALSE |
| C9H7NO   | Indole-4-carboxaldehyde | Heterocyclic compounds | Indole and Its derivatives | FALSE | up   | FALSE |
| C6H13O9P | Inositol 1-phosphate    | Alcohol and amines     | Alcohols                   | down  | down | FALSE |
|          |                         | Organic acid And Its   |                            |       |      |       |
| C2H6O4S  | Isethionic acid         | derivatives            | Sulfonic acids             | up    | up   | FALSE |
|          |                         | Organic acid And Its   | Organic acid And Its       |       |      |       |
| C6H8O7   | Isocitric acid          | derivatives            | derivatives                | up    | up   | FALSE |
| C12H22O1 |                         |                        |                            |       |      |       |
| 1        | Kojibiose               | Others                 | Others                     | down  | down | FALSE |
| C6H14N4O |                         | Amino acid and Its     |                            |       |      |       |
| 2        | L-Arginine              | metabolites            | Amino acids                | up    | up   | FALSE |
|          |                         | Amino acid and Its     |                            |       |      |       |
| C4H8N2O3 | L-Asparagine Anhydrous  | metabolites            | Amino acids                | up    | up   | FALSE |
|          |                         | Amino acid and Its     |                            |       |      |       |
| C4H7NO4  | L-Aspartic Acid         | metabolites            | Amino acids                | FALSE | up   | FALSE |
| C6H13N3O |                         | Amino acid and Its     |                            |       |      |       |
| 3        | L-Citrulline            | metabolites            | Amino acids                | up    | up   | FALSE |
|          |                         | Amino acid and Its     |                            |       |      |       |
| C3H7NO2S | L-Cysteine              | metabolites            | Amino acids                | down  | down | FALSE |

|            |                      |                                   |                                   |       |       |       |
|------------|----------------------|-----------------------------------|-----------------------------------|-------|-------|-------|
| C5H6N2O4   | L-Dihydroorotic Acid | Organic acid And Its derivatives  | Organic acid And Its derivatives  | FALSE | down  | down  |
| C6H12O5    | L-Fucose             | Carbohydrates and Its metabolites | Sugars                            | up    | up    | FALSE |
| C5H10N2O3  | L-Glutamine          | Amino acid and Its metabolites    | Amino acids                       | up    | up    | FALSE |
| C6H12O6    | L-Gulose             | Carbohydrates and Its metabolites | Carbohydrates and Its metabolites | down  | down  | FALSE |
| C7H16N4O2  | L-Homoarginine       | Amino acid and Its metabolites    | Amino acids                       | down  | down  | FALSE |
| C5H9NO2    | L-Proline            | Amino acid and Its metabolites    | Amino acids                       | down  | down  | FALSE |
| C7H14N2O3  | L-Theanine           | Amino acid and Its metabolites    | Amino acids                       | down  | down  | FALSE |
| C9H11NO3   | L-Tyrosine           | Amino acid and Its metabolites    | Amino acids                       | up    | up    | FALSE |
| C28H52NO7P | LPC(0:0/20:3)        | GP                                | LPC                               | up    | up    | FALSE |
| C30H52NO7P | LPC(0:0/22:5)        | GP                                | LPC                               | up    | up    | FALSE |
| C28H52NO7P | LPC(20:3/0:0)        | GP                                | LPC                               | up    | up    | FALSE |
| C30H52NO7P | LPC(22:5/0:0)        | GP                                | LPC                               | up    | up    | FALSE |
| C26H54NO6P | LPC(O-18:1/0:0)      | GP                                | LPC                               | down  | FALSE | FALSE |

|          |               |                                     |                                     |       |    |       |  |
|----------|---------------|-------------------------------------|-------------------------------------|-------|----|-------|--|
| C21H42NO |               |                                     |                                     |       |    |       |  |
| 7P       | LPE(0:0/16:1) | GP                                  | LPE                                 | up    | up | FALSE |  |
| C23H44NO |               |                                     |                                     |       |    |       |  |
| 7P       | LPE(0:0/18:2) | GP                                  | LPE                                 | up    | up | FALSE |  |
| C25H46NO |               |                                     |                                     |       |    |       |  |
| 7P       | LPE(0:0/20:3) | GP                                  | LPE                                 | up    | up | FALSE |  |
| C25H42NO |               |                                     |                                     |       |    |       |  |
| 7P       | LPE(0:0/20:5) | GP                                  | LPE                                 | FALSE | up | FALSE |  |
| C27H46NO |               |                                     |                                     |       |    |       |  |
| 7P       | LPE(0:0/22:5) | GP                                  | LPE                                 | up    | up | FALSE |  |
| C27H44NO |               |                                     |                                     |       |    |       |  |
| 7P       | LPE(0:0/22:6) | GP                                  | LPE                                 | up    | up | FALSE |  |
| C21H42NO |               |                                     |                                     |       |    |       |  |
| 7P       | LPE(16:1/0:0) | GP                                  | LPE                                 | up    | up | FALSE |  |
| C25H46NO |               |                                     |                                     |       |    |       |  |
| 7P       | LPE(20:3/0:0) | GP                                  | LPE                                 | up    | up | FALSE |  |
| C25H44NO |               |                                     |                                     |       |    |       |  |
| 7P       | LPE(20:4/0:0) | GP                                  | LPE                                 | up    | up | FALSE |  |
| C25H42NO |               |                                     |                                     |       |    |       |  |
| 7P       | LPE(20:5/0:0) | GP                                  | LPE                                 | FALSE | up | FALSE |  |
| C27H46NO |               |                                     |                                     |       |    |       |  |
| 7P       | LPE(22:5/0:0) | GP                                  | LPE                                 | up    | up | FALSE |  |
| C27H44NO |               |                                     |                                     |       |    |       |  |
| 7P       | LPE(22:6/0:0) | GP                                  | LPE                                 | up    | up | FALSE |  |
| C30H30O7 | LY223982      | Benzene and substituted derivatives | Benzene and substituted derivatives | up    | up | FALSE |  |

|                |                  |                                     |                                     |       |      |       |
|----------------|------------------|-------------------------------------|-------------------------------------|-------|------|-------|
| C9H18N2O<br>3  | Leu-Ala          | Amino acid and Its<br>metabolites   | Small Peptide                       | up    | up   | FALSE |
| C11H20N2<br>O5 | Leu-Glu          | Amino acid and Its<br>metabolites   | Small Peptide                       | FALSE | up   | FALSE |
| C12H24N2<br>O3 | Leu-Leu          | Amino acid and Its<br>metabolites   | Small Peptide                       | up    | up   | FALSE |
| C15H22N2<br>O3 | Leu-Phe          | Amino acid and Its<br>metabolites   | Small Peptide                       | up    | up   | FALSE |
| C9H19N3O<br>3  | Lys-Ala          | Amino acid and Its<br>metabolites   | Small Peptide                       | down  | down | FALSE |
| C8H17N3O<br>3  | Lys-Gly          | Amino acid and Its<br>metabolites   | Small Peptide                       | down  | down | FALSE |
| C12H25N3<br>O3 | Lys-Leu          | Amino acid and Its<br>metabolites   | Small Peptide                       | down  | down | FALSE |
| C15H23N3<br>O3 | Lys-Phe          | Amino acid and Its<br>metabolites   | Small Peptide                       | up    | up   | FALSE |
| C11H21N3<br>O3 | Lys-Pro          | Amino acid and Its<br>metabolites   | Small Peptide                       | FALSE | down | FALSE |
| C11H23N3<br>O3 | Lys-Val          | Amino acid and Its<br>metabolites   | Small Peptide                       | down  | down | FALSE |
| C25H38O4       | MG(0:0/22:6/0:0) | GL                                  | MG                                  | up    | up   | FALSE |
| C21H40O4       | MG(18:1/0:0/0:0) | GL                                  | MG                                  | up    | up   | FALSE |
| C23H38O4       | MG(20:4/0:0/0:0) | GL                                  | MG                                  | up    | up   | FALSE |
| C25H38O4       | MG(22:6/0:0/0:0) | GL                                  | MG                                  | up    | up   | FALSE |
| C4H4O4         | Maleic Acid      | Organic acid And Its<br>derivatives | Organic acid And Its<br>derivatives | down  | down | FALSE |

|          |                                 |  |                         |                            |       |       |       |  |
|----------|---------------------------------|--|-------------------------|----------------------------|-------|-------|-------|--|
| C12H24O1 |                                 |  | Carbohydrates and Its   |                            |       |       |       |  |
| 1        | Maltitol                        |  | metabolites             | Sugar alcohols             | up    | up    | FALSE |  |
| C13H16N2 |                                 |  | Hormones and hormone    | Hormones and hormone       |       |       |       |  |
| O2       | Melatonin                       |  | related compounds       | related compounds          | up    | up    | FALSE |  |
| C10H20N2 |                                 |  | Amino acid and Its      |                            |       |       |       |  |
| O3S      | Met-Val                         |  | metabolites             | Small Peptide              | down  | down  | FALSE |  |
| C11H11NO |                                 |  |                         |                            |       |       |       |  |
| 3        | Methoxyindoleacetic Acid        |  | Heterocyclic compounds  | Indole and Its derivatives | FALSE | down  | FALSE |  |
| C11H11NO |                                 |  |                         |                            |       |       |       |  |
| 2        | Methyl Indole-3-Acetate         |  | Heterocyclic compounds  | Indole and Its derivatives | FALSE | up    | FALSE |  |
|          |                                 |  | Amino acid and Its      |                            |       |       |       |  |
| C4H9NO2S | Methylcysteine                  |  | metabolites             | Amino acids                | down  | down  | FALSE |  |
| C12H14O4 | Monobutyl phthalate             |  | Aldehyde,Ketones,Esters | Esters                     | down  | down  | FALSE |  |
|          |                                 |  | Benzene and substituted |                            |       |       |       |  |
| C11H14O4 | Multifidol                      |  | derivatives             | Phenolics                  | up    | up    | FALSE |  |
| C11H12N2 |                                 |  | Amino acid and Its      |                            |       |       |       |  |
| O4       | N'-Formylkynurenine             |  | metabolites             | Amino acid derivatives     | up    | up    | FALSE |  |
| C11H18N2 | N(Alpha)-Acetyl-Epsilon-(2-Prop |  | Amino acid and Its      |                            |       |       |       |  |
| O4       | enal)Lysine                     |  | metabolites             | Small Peptide              | down  | FALSE | FALSE |  |
|          | N,-N-diacetyl-O-methylhydroxyl  |  |                         |                            |       |       |       |  |
| C5H9NO3  | amine                           |  | Alcohol and amines      | Polyamines                 | up    | up    | FALSE |  |
| C11H11NO |                                 |  | Benzene and substituted | Benzene and substituted    |       |       |       |  |
| 3        | N-(3-Hydroxypropyl)phthalimide  |  | derivatives             | derivatives                | FALSE | down  | FALSE |  |
|          |                                 |  | Amino acid and Its      |                            |       |       |       |  |
| C8H15NO3 | N-Acetyl-L-Leucine              |  | metabolites             | Amino acid derivatives     | up    | up    | FALSE |  |
| C11H13NO | N-Acetyl-L-Tyrosine             |  | Amino acid and Its      | Amino acid derivatives     | up    | up    | FALSE |  |



|          |                             |                       |                        |       |       |       |
|----------|-----------------------------|-----------------------|------------------------|-------|-------|-------|
| 4        |                             | metabolites           |                        |       |       |       |
| C11H13NO |                             | Amino acid and Its    |                        |       |       |       |
| 3        | N-Acetyl-L-phenylalanine    | metabolites           | Amino acid derivatives | up    | up    | FALSE |
| C6H10N2O |                             | Amino acid and Its    |                        |       |       |       |
| 4        | N-Alpha-Acetyl-L-Asparagine | metabolites           | Amino acid derivatives | FALSE | down  | FALSE |
| C5H9N3O4 |                             | Amino acid and Its    |                        |       |       |       |
|          | N-Amidino-L-Aspartate       | metabolites           | Amino acid derivatives | up    | up    | FALSE |
| C4H9NO2  |                             | Amino acid and Its    |                        |       |       |       |
|          | N-Ethylglycine              | metabolites           | Amino acid derivatives | down  | FALSE | FALSE |
| C5H9NO4  |                             | Amino acid and Its    |                        |       |       |       |
|          | N-Methyl-D-Aspartic Acid    | metabolites           | Amino acid derivatives | down  | down  | FALSE |
| C6H11NO4 |                             | Amino acid and Its    |                        |       |       |       |
|          | N-Methyl-L-Glutamate        | metabolites           | Amino acid derivatives | up    | up    | FALSE |
| C4H9NO2  |                             | Amino acid and Its    |                        |       |       |       |
|          | N-Methylalanine             | metabolites           | Amino acid derivatives | down  | FALSE | FALSE |
| C14H25NO |                             | Carbohydrates and Its | Carbohydrates and Its  |       |       |       |
| 11       | N-acetyl-D-Lactosamine      | metabolites           | metabolites            | down  | down  | FALSE |
| C5H9NO3  |                             | Amino acid and Its    |                        |       |       |       |
|          | N-acetyl-beta-alanine       | metabolites           | Amino acid derivatives | up    | up    | FALSE |
| C7H14N2O |                             | Amino acid and Its    |                        |       |       |       |
| 3        | N-acetylorithine            | metabolites           | Amino acid derivatives | up    | up    | FALSE |
| C12H15NO |                             | Amino acid and Its    |                        |       |       |       |
| 4        | N-lactoyl-phenylalanine     | metabolites           | Amino acid derivatives | down  | down  | FALSE |
| C9H20N2O |                             | Amino acid and Its    |                        |       |       |       |
| 2        | N6,N6,N6-Trimethyl-L-lysine | metabolites           | Amino acid derivatives | down  | down  | FALSE |
| C14H17N5 |                             | Nucleotide And Its    | Nucleotide And Its     | down  | down  | FALSE |
|          | N6-Succinyl Adenosine       |                       |                        |       |       |       |

|          |                             |                                   |                        |       |       |       |
|----------|-----------------------------|-----------------------------------|------------------------|-------|-------|-------|
| O8       |                             | metabolites                       | metabolites            |       |       |       |
| C11H15N5 |                             | Nucleotide And Its                | Nucleotide And Its     |       |       |       |
| O4       | N6-methyladenosine          | metabolites                       | metabolites            | up    | up    | FALSE |
| C6H6N2O  | Nicotinamide                | CoEnzyme and vitamins             | CoEnzyme and vitamins  | down  | FALSE | FALSE |
| C5H9NO4  | O-Acetyl-L-serine           | Amino acid and Its<br>metabolites | Amino acid derivatives | down  | down  | FALSE |
| C3H8NO6P | O-Phospho-L-Serine          | Amino acid and Its<br>metabolites | Amino acid derivatives | up    | up    | FALSE |
| C18H35NO | Oleamide                    | Alcohol and amines                | Amines                 | FALSE | down  | FALSE |
| C5H4N2O4 | Orotic Acid                 | CoEnzyme and vitamins             | CoEnzyme and vitamins  | down  | down  | FALSE |
| C28H56NO |                             |                                   |                        |       |       |       |
| 8P       | PC(12:0/12:0)               | GP                                | PC                     | up    | up    | FALSE |
| C18H37NO |                             |                                   |                        |       |       |       |
| 2        | Palmitoylethanolamide (PEA) | Alcohol and amines                | Amines                 | down  | down  | FALSE |
| C9H19NO4 | Pantothenol                 | CoEnzyme and vitamins             | CoEnzyme and vitamins  | FALSE | FALSE | up    |
| C18H27N3 |                             | Amino acid and Its                |                        |       |       |       |
| O4       | Phe-Ala-Leu                 | metabolites                       | Small Peptide          | up    | up    | FALSE |
| C13H17N3 |                             | Amino acid and Its                |                        |       |       |       |
| O4       | Phe-Asn                     | metabolites                       | Small Peptide          | up    | up    | FALSE |
| C11H14N2 |                             | Amino acid and Its                |                        |       |       |       |
| O3       | Phe-Gly                     | metabolites                       | Small Peptide          | up    | up    | FALSE |
| C14H20N2 |                             | Amino acid and Its                |                        |       |       |       |
| O3S      | Phe-Met                     | metabolites                       | Small Peptide          | up    | up    | FALSE |
| C18H20N2 |                             | Amino acid and Its                |                        |       |       |       |
| O3       | Phe-Phe                     | metabolites                       | Small Peptide          | up    | up    | FALSE |
| C12H16N2 | Phe-Ser                     | Amino acid and Its                | Small Peptide          | up    | up    | FALSE |

|          |                                             |                        |                        |       |       |       |
|----------|---------------------------------------------|------------------------|------------------------|-------|-------|-------|
| O4       |                                             | metabolites            |                        |       |       |       |
| C20H21N3 |                                             | Amino acid and Its     |                        |       |       |       |
| O3       | Phe-Trp                                     | metabolites            | Small Peptide          | up    | up    | FALSE |
| C9H10O3  | Phenyllactate(Pla)                          | Organic acid And Its   | Organic acid And Its   | down  | down  | FALSE |
| C6H11NO2 | Piperidine acid                             | derivatives            | derivatives            | down  | down  | FALSE |
| C10H16N2 |                                             | Organic acid And Its   | Organic acid And Its   | down  | down  | FALSE |
| O5       | Pro-Glu                                     | derivatives            | derivatives            | down  | down  | FALSE |
| C11H20N2 |                                             | Amino acid and Its     | Small Peptide          | down  | down  | FALSE |
| O3       | Pro-Leu                                     | metabolites            | Small Peptide          | down  | FALSE | FALSE |
| C8H14N2O |                                             | Amino acid and Its     | Small Peptide          | down  | FALSE | FALSE |
| 4        | Pro-Ser                                     | metabolites            | Small Peptide          | down  | FALSE | FALSE |
| C10H18N2 |                                             | Amino acid and Its     | Small Peptide          | down  | down  | FALSE |
| O3       | Pro-Val                                     | metabolites            | Small Peptide          | down  | down  | FALSE |
| C5H4N2O2 | Pyrimidine-4-carboxylic acid<br>sodium salt | Heterocyclic compounds | Heterocyclic compounds | down  | FALSE | up    |
| H4O7P2   | Pyrophosphate                               | Organic acid And Its   | Phosphoric acids       | down  | down  | FALSE |
| C7H12O6  | Quinic acid                                 | derivatives            | Organic acid And Its   | down  | down  | FALSE |
| C4H5NO2S |                                             | derivatives            | derivatives            | down  | down  | FALSE |
| 2        | Raphanusamic acid                           | Organic acid And Its   | Organic acid And Its   | down  | down  | FALSE |
| C4H9NO3S | S-Methyl-L-Cysteine-S-oxide                 | derivatives            | derivatives            | down  | down  | FALSE |
| C7H15N3O | S-methyl-L-thiocitrulline                   | Amino acid and Its     | Amino acid derivatives | up    | up    | FALSE |
|          |                                             | metabolites            | Amino acid derivatives | FALSE | up    | FALSE |

|             |                           |                                        |                                        |       |       |       |
|-------------|---------------------------|----------------------------------------|----------------------------------------|-------|-------|-------|
| 2S          |                           | metabolites                            |                                        |       |       |       |
| C10H18O4    | Sebacate                  | Organic acid And Its derivatives       | Organic acid And Its derivatives       | up    | up    | FALSE |
| C6H12N2O4   | Ser-Ala                   | Amino acid and Its metabolites         | Amino acid derivatives                 | up    | up    | FALSE |
| C8H16N2O4   | Ser-Val                   | Amino acid and Its metabolites         | Small Peptide                          | FALSE | down  | FALSE |
| C6H15O9P    | Sorbitol 6-phosphate      | Carbohydrates and Its metabolites      | Phosphate sugars                       | down  | down  | FALSE |
| C23H50N2O5P | Sphingosyl-phosphocholine | SL                                     | SM                                     | down  | down  | FALSE |
| C4H6O4      | Succinic Acid             | Organic acid And Its derivatives       | Organic acid And Its derivatives       | down  | FALSE | FALSE |
| C4H4O3      | Succinic anhydride        | Organic acid And Its derivatives       | Organic acid And Its derivatives       | up    | up    | FALSE |
| C8H6O4      | Terephthalic Acid         | Benzene and substituted derivatives    | Phenolic acids                         | down  | down  | FALSE |
| C27H40O3    | Testosterone              | Hormones and hormone related compounds | Hormones and hormone related compounds | down  | down  | FALSE |
| C6H15O4P    | Triethyl-phosphate        | Organic acid And Its derivatives       | Phosphoric acids                       | down  | down  | FALSE |
| C7H7NO2     | Trigonelline              | CoEnzyme and vitamins                  | CoEnzyme and vitamins                  | down  | FALSE | FALSE |
| C9H10O3     | Tropine                   | Organic acid And Its derivatives       | Organic acid And Its derivatives       | down  | down  | FALSE |
| C16H19N3O5  | Trp-Glu                   | Amino acid and Its metabolites         | Small Peptide                          | down  | down  | FALSE |

|                |                     |                                     |                                     |       |       |       |
|----------------|---------------------|-------------------------------------|-------------------------------------|-------|-------|-------|
| C13H17N3<br>O5 | Tyr-Asn             | Amino acid and Its<br>metabolites   | Small Peptide                       | down  | down  | FALSE |
| C12H16N2<br>O5 | Tyr-Ser             | Amino acid and Its<br>metabolites   | Small Peptide                       | up    | up    | FALSE |
| CH4N2O         | Urea                | Alcohol and amines                  | Amines                              | up    | up    | FALSE |
| C5H8N2O5       | Ureidosuccinic acid | Amino acid and Its<br>metabolites   | Amino acid derivatives              | up    | up    | FALSE |
| C5H4N4O3       | Uric acid           | Organic acid And Its<br>derivatives | Organic acid And Its<br>derivatives | down  | down  | FALSE |
| C9H12N2O<br>6  | Uridine             | Nucleotide And Its<br>metabolites   | Nucleotide And Its<br>metabolites   | up    | up    | FALSE |
| C33H42N4<br>O6 | Urobilin            | Tryptamines,Cholines,Pigmen<br>ts   | Pigments                            | FALSE | FALSE | up    |
| C8H16N2O<br>3  | Val-Ala             | Amino acid and Its<br>metabolites   | Small Peptide                       | up    | up    | FALSE |
| C9H18N2O<br>4  | Val-Thr             | Amino acid and Its<br>metabolites   | Small Peptide                       | down  | down  | FALSE |
| C5H4N4O2       | Xanthine            | Nucleotide And Its<br>metabolites   | Nucleotide And Its<br>metabolites   | up    | up    | FALSE |
| C10H12N4<br>O6 | Xanthosine          | Nucleotide And Its<br>metabolites   | Nucleotide And Its<br>metabolites   | down  | down  | FALSE |
| C10H14N2<br>O6 | cyclo(glu-glu)      | Amino acid and Its<br>metabolites   | Small Peptide                       | up    | up    | FALSE |
| C8H14N2O<br>5  | gamma-Glu-Ala       | Amino acid and Its<br>metabolites   | Small Peptide                       | down  | down  | FALSE |
| C9H12N2O       | B-Pseudouridine     | Nucleotide And Its                  | Nucleotide And Its                  | up    | up    | FALSE |

|          |                                              |                                  |                                  |      |      |       |
|----------|----------------------------------------------|----------------------------------|----------------------------------|------|------|-------|
| 6        |                                              | metabolites                      | metabolites                      |      |      |       |
| C5H8O5   | $\alpha$ -Hydroxyglutaric Acid (sodium salt) | Organic acid And Its derivatives | Organic acid And Its derivatives | down | down | FALSE |
| C10H18N2 |                                              | Amino acid and Its metabolites   |                                  |      |      |       |
| O5S      | $\gamma$ -Glu-Met                            |                                  | Small Peptide                    | up   | up   | FALSE |

---

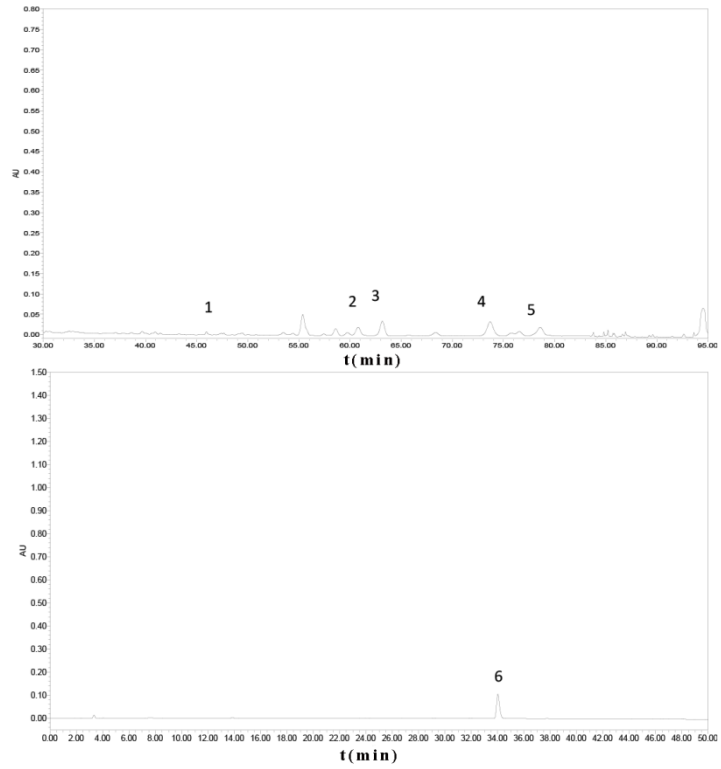

**Supplementary Figure 1 The stabilization and control for representative compounds in WZYD by UHPLC.( 1 Ginsenoside Rb1; 2 Limonin; 3 6-Gingerol; 4 Evodiamine; 5rutaecarpine; 6 Dehydroevodiamine)**

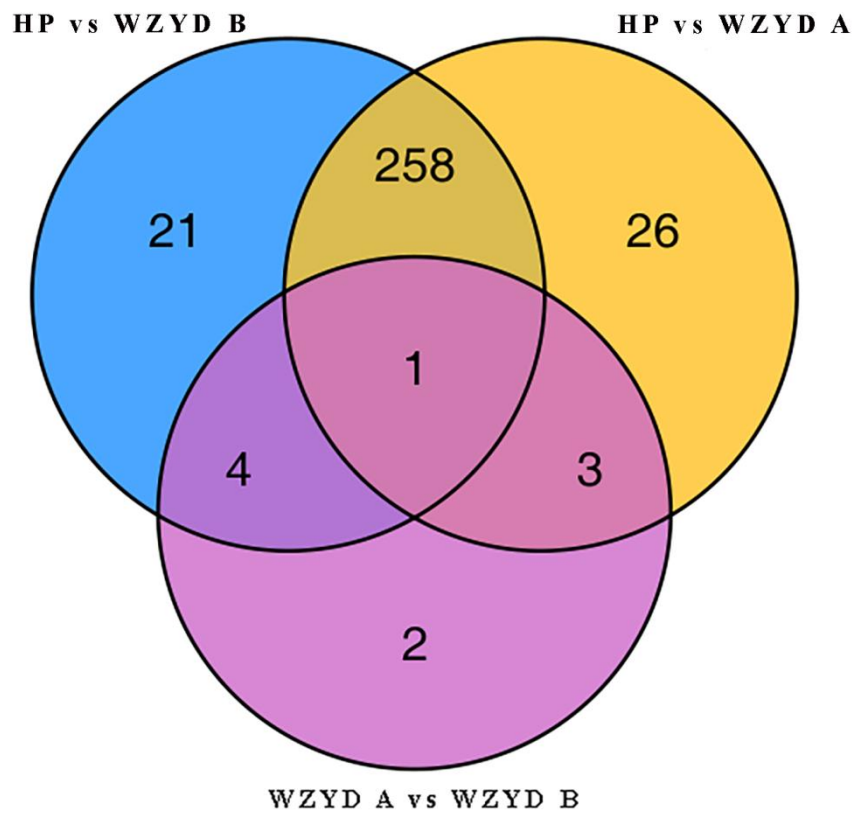

**Supplementary Figure 2 Differential metabolites of Venn diagram.(WZYD B, patients before WZYD treatment; WZYD A, patients after WZYD treatment; HP, healthy people)**
